# Supplementary material for: Metabolomics of Red Wines Aged Traditionally, with Chips or Staves
Source: MDPI journal article supplement (doi:10.3390/foods13020196), 2024-01-07
Supplement: s1 [file s1]

### ***Identification criteria and quantification***

Aroma compounds were subjected to an identification process that involved three stages. Firstly, a tentative identification of metabolites was considered when the similarity values were equal or greater than 75% between the mass spectrum obtained for each chromatographic peak in samples and the mass spectral libraries (NIST-08 and Willey-7). Secondly, a difference lower than 15 units was considered between the linear retention index obtained for each compound through Van Den Dool & Kraft method (LR<sub>Ic</sub>) and those reported (LR<sub>Ir</sub>) in the NIST webbook of Chemistry. Finally, those compounds that did not meet these two requirements, were subjected to a definitive confirmation with the mass spectrum of their relative pure standards.

The quantification process was carried out through the internal standard quantification method, using calibration curves obtained with standard solutions subjected to the same analytical conditions as wine samples. The selection of target and qualifiers ions used for this purpose were performed with the Chemstation software (Agilent Technologies, Palo Alto, CA). The calibration curves from compounds with the most similar chemical structures and/or similar number of C atoms was used to estimate the concentration of those volatiles without pure compounds commercially available.

**Supplementary Table S1.** Major and minor aroma compounds identified in the wines.

|                   | No.                          | Compound                            | Prv <sup>‡</sup> | CAS <sup>c</sup> | LRI <sup>a</sup> | LRI <sup>b</sup> | Slope     | Interception | R <sup>2</sup> | LOD <sup>d</sup><br>(µg/L) | LOQ <sup>e</sup><br>(µg/L) |
|-------------------|------------------------------|-------------------------------------|------------------|------------------|------------------|------------------|-----------|--------------|----------------|----------------------------|----------------------------|
| *MAJOR COMPOUNDS  | <b>Alcohols</b>              |                                     |                  |                  |                  |                  |           |              |                |                            |                            |
|                   | 1                            | Methanol                            | M                | 67-56-1          | 925              | 879              | 5.04E-03  | 6.0E-03      | 0.995          | 5.7E+03                    | 19E+03                     |
|                   | 2                            | Propan-1-ol                         | S                | 71-23-8          | 1068             | 1060             | 9.1E-03   | 5.0E-03      | 0.995          | 4.8E+03                    | 16E+03                     |
|                   | 3                            | 2-methylpropan-1-ol<br>(isobutanol) | S                | 78-83-1          | 1126             | 1108             | 9.5E-03   | 3.0E-03      | 0.999          | 1.8E+03                    | 6.0E+03                    |
|                   | 4                            | Isoamyl alcohols <sup>†</sup>       | M                | 123-51-3         | 1243             | 1230             | 8.7E+03   | 9.0E-03      | 0.999          | 4.2E+03                    | 14E+03                     |
|                   | 5                            | 2- Phenylethan-1-ol                 | S                | 60-12-8          | 2011             | 1892             | 11E-03    | 2E-03        | 0.999          | 3.6E+03                    | 12E+03                     |
|                   | <b>Aldehydes and ketones</b> |                                     |                  |                  |                  |                  |           |              |                |                            |                            |
|                   | 6                            | Acetaldehyde                        | S                | 75-07-0          | 688              | 800              | 4.23E-03  | -7.0E-04     | 0.999          | 7.8E+03                    | 26E+03                     |
|                   | 7                            | Acetoin                             | S                | 513-86-0         | 1337             | 1309             | 5.08E-03  | -1E-03       | 0.997          | 9.1E+02                    | 3E+03                      |
|                   | <b>Esters</b>                |                                     |                  |                  |                  |                  |           |              |                |                            |                            |
|                   | 8                            | Ethyl acetate                       | S                | 141-78-6         | 906              | 885              | 4.96E-03  | -3.0E-04     | 0.998          | 2.1E+03                    | 7E+03                      |
|                   | 9                            | Ethyl lactate                       | S                | 97-64-3          | 1354             | 1326             | 5.7E-03   | 3E-02        | 0.999          | 2.7E+03                    | 9E+03                      |
|                   | 10                           | Diethyl succinate                   | S                | 123-25-1         | 1730             | 1702             | 5.8E-03   | 2.8E-02      | 0.996          | 3.0E+03                    | 10E+03                     |
| **MINOR COMPOUNDS | <b>Alcohols</b>              |                                     |                  |                  |                  |                  |           |              |                |                            |                            |
|                   | 11                           | E-2-hexen-1-ol                      | S                | 928-95-0         | 866.9            | 861              | 6.00E-04  | 2.60E-03     | 0.974          | 2                          | 8                          |
|                   | 12                           | E-3-hexen-1-ol                      | S                | 928-97-2         | 857              | 851              | 2.63E-03  | -3.615E-03   | 0.968          | 0.54                       | 1.8                        |
|                   | 13                           | Hexan-1-ol                          | F                | 111-27-3         | 867              | 867              | 1.00E-03  | 0.00E+00     | 0.944          | 3                          | 11                         |
|                   | 14                           | Furfuryl alcohol                    | F                | 98-00-0          | 851              | 851              | 2.20E-02  | 8.50E-03     | 0.922          | 20                         | 66                         |
|                   | 15                           | Benzyl alcohol                      |                  | 100-51-6         | 1023             | 1020             | 1.883E-02 | 6.79E-04     | 0.942          | 1.08                       | 3.6                        |
|                   | <b>Aldehydes and ketones</b> |                                     |                  |                  |                  |                  |           |              |                |                            |                            |
|                   | 16                           | Heptanal                            | S                | 111-71-7         | 903              | 901              | 7.90E-03  | 2.56E-03     | 0.961          | 0.4                        | 1.3                        |
|                   | 17                           | Benzaldehyde                        | S                | 100-52-7         | 958.9            | 959              | 5.10E-03  | 7.00E-03     | 0.988          | 3                          | 10                         |
|                   | 18                           | Octanal                             | S                | 124-13-0         | 1004             | 1004             | 9.10E-03  | 1.80E-02     | 0.961          | 0.2                        | 0.6                        |
|                   | <b>Esters</b>                |                                     |                  |                  |                  |                  |           |              |                |                            |                            |
|                   | <b>ETHYL ESTERS</b>          |                                     |                  |                  |                  |                  |           |              |                |                            |                            |
|                   | 19                           | Ethyl propanoate                    | S                | 105-37-3         | 708              | 705              | 2.20E-03  | 9.60E-03     | 0.967          | 12                         | 39                         |
|                   | 20                           | Ethyl butanoate                     | S                | 105-54-4         | 802              | 802              | 7.80E-03  | 1.03E-03     | 0.989          | 23                         | 76                         |
|                   | 21                           | Ethyl octanoate                     | F                | 106-32-1         | 1198             | 1196             | 1.78E-01  | -4.70E-03    | 0.988          | 7                          | 25                         |
|                   | 22                           | Ethyl decanoate                     | F                | 110-38-3         | 1395             | 1397             | 1.69E-01  | 6.90E-03     | 0.976          | 0.5                        | 1.7                        |
|                   | 23                           | Ethyl dodecanoate                   | F                | 106-33-2         | 1594             | 1593             | 1.79E-01  | 7.10E-03     | 0.986          | 0.3                        | 0.9                        |
|                   | 24                           | Ethyl tetradecanoate                | F                | 124-06-1         | 1793             | 1793             | 1.84E-01  | 6.51E-03     | 0.987          | 0.5                        | 1.6                        |
|                   | 25                           | Ethyl hexadecanoate                 | F                | 628-97-7         | 1992             | 1996             | 1.83E-01  | -2.60E-03    | 0.971          | 0.6                        | 2.1                        |
|                   | 26                           | Ethyl vainillate <sup>1</sup>       |                  | 617-05-00        | 2671             | 2676             |           |              |                |                            |                            |

| No.                                          | Compound                                 | Prv <sup>‡</sup> | CAS <sup>c</sup> | LRI <sup>a</sup> | LRI <sup>b</sup> | Slope    | Interception | R <sup>2</sup> | LOD <sup>d</sup><br>(µg/L) | LOQ <sup>e</sup><br>(µg/L) |
|----------------------------------------------|------------------------------------------|------------------|------------------|------------------|------------------|----------|--------------|----------------|----------------------------|----------------------------|
| 27                                           | Ethyl cinnamate                          |                  | 4610-69-9        |                  |                  | 7.78E-03 | 1.05E-02     | 0.989          |                            |                            |
| 28                                           | Ethyl isobutanoate                       | S                | 97-62-1          | 753              | 755              | 8.22E-02 | 1.64E-02     | 0.989          | 1                          | 4                          |
| <b>HIGHER ALCOHOL ACETATES (HAAs)</b>        |                                          |                  |                  |                  |                  |          |              |                |                            |                            |
| 29                                           | Isobutyl acetate                         | S                | 110-19-0         | 772              | 781              | 4.80E-02 | 1.18E-02     | 0.984          | 0.5                        | 1.6                        |
| 30                                           | 2-Phenylethyl acetate                    | S                | 103-45-7         | 1256             | 1256             | 6.22E-02 | 4.10E-03     | 0.995          | 3                          | 9                          |
| 31                                           | Phenethyl phenyl acetate                 | M                | 102-20-5         | 1919             | 1924             | 1.499E00 | 2.71E-02     | 0.983          | 0.54                       | 1.8                        |
| <b>ISOAMYL ESTERS OF FATTY ACIDS (IEFAs)</b> |                                          |                  |                  |                  |                  |          |              |                |                            |                            |
| 32                                           | 3-Methylbutyl acetate (Isoamyl acetate)  | F                | 123-92-2         | 875              | 876              | 4.80E-02 | 1.12E-02     | 0.984          | 22                         | 75                         |
| <b>Lactones</b>                              |                                          |                  |                  |                  |                  |          |              |                |                            |                            |
| 33                                           | 5-H-furan-2-one (γ-crotonolactone)       | S                | 497-23-4         | 913              | 916              | 1.00E-04 | 5.70E-03     | 0.972          | 9                          | 29                         |
| 34                                           | Dihydrofuran-2(3H)-one (γ-butyrolactone) | F                | 96-48-0          | 918              | 922              | 2.00E-04 | 4.70E-04     | 0.974          | 14                         | 47                         |
| 35                                           | 5-Pentylloxolan-2-one (γ-nonolactone)    | M                | 104-61-0         | 1363             | 1362             | 4.90E-03 | -1.00E-04    | 0.943          | 1                          | 4                          |
| 36                                           | γ-Decalactone                            | S                | 706-14-9         | 1470             | 1470             | 7.34E-02 | -1.31E-02    | 0.983          | 1                          | 4                          |
| 37                                           | E-whisky lactone                         | M                | 39638-67-0       | 1915             | 1914             | 1.50E-04 | 7.03E-03     | 0.970          | 1.62                       | 5.4                        |
| 38                                           | Z-whisky lactone                         | M                | 55013-32-6       | 1290             | 1293             | 1.74E-04 | 6.81E-03     | 0.982          | 5.67                       | 18.9                       |
| <b>Volatile phenols</b>                      |                                          |                  |                  |                  |                  |          |              |                |                            |                            |
| 39                                           | 2-Methoxyphenol (Guaiacol)               | S                | 90-05-1          | 1091             | 1088             | 3.30E-03 | 1.50E-03     | 0.933          | 2                          | 6                          |
| 40                                           | 2-methoxy-4-vinylphenol                  | S                | 7786-61-0        | 1318             | 1315             | 1.81E-03 | -3.14E-04    | 0.923          | 4.05                       | 13.5                       |
| <b>Furanic compounds</b>                     |                                          |                  |                  |                  |                  |          |              |                |                            |                            |
| 41                                           | Furan-2-carbaldehyde                     | F                | 98-01-1          | 831              | 830              | 2.40E-03 | 1.18E-02     | 0.978          | 22                         | 72                         |
| 42                                           | 5-Methylfurfural                         | M                | 620-02-0         | 967              | 964              | 6.38E-04 | 1.01E-02     | 0.942          | 95                         | 315                        |
| 43                                           | 5-(Hydroxymethyl)-2-furaldehyde          | S                | 67-47-0          | 1226             | 1226             | 2.60E-03 | 1.28E-02     | 0.988          | 18                         | 59                         |

**LRI:** Linear retention index using definition of Van den Dool and Kratz (1963) in a \*CPWAX57-CB capillary column (60 m/0.25 mm/0.40 µm. He) and \*\*HP-5MS capillary column (30 m/0.25 mm/0.25 µm. He). .n.f. – not found in faced conditions. <sup>a</sup>Calculated values <sup>b</sup>Data collected from the NIST Webbook of Chemistry. <http://webbook.nist.gov/chemistry>. <sup>c</sup>CAS: Chemical Abstracts

Service number. <sup>d</sup>LOD: Limit of Detection. <sup>e</sup>LOQ: Limit of Quantification. <sup>†</sup> Isoamyl alcohols = 2-methylbutanol + 3-methylbutanol. <sup>1</sup>Quantified as ethyl decanoate.. <sup>‡</sup>Prv: Standard providers.  
F: Fluka; M: Merck; S: Sigma-Aldrich.
